# Supplementary material for: Work–Life Balance: Weighing the Importance of Work–Family and Work–Health Balance
Source: PubMed Central journal article supplement (PMC7037206; doi:10.3390/ijerph17030907), 2020-02-01
Supplement: ijerph-17-00907-s001.pdf [file ijerph-17-00907-s001.pdf]

# Supplementary material

## Harman's single factor test

```
jmv::efa(data = data, vars = vars( WAI 1,WAI 2,WAI 3,WAI 4,WAI 5,WAI 6,WAI 7,WAI 8,WAI 9,WAI 10,WFC 1,WFC 2,WFC 3,WFC 4,WFC 5, WFC 6, WHB 1, WHB 2, WHB 3, WHB 4, WHB 5, WHB 6, WHB 7, WHB 8, WHB 9, WHB 10, WHB 11, WHB 12, WHB 13, WHB 14, WHB 15, WHB 16, WHB 17, JS), rotation = "none", factorSummary = TRUE)
```

## Exploratory Factor Analysis

**Table S1.** Factor Loadings of the EFA performed for the Harman's single factor test

|        | Factor |       |       |   |       |       | Uniqueness |
|--------|--------|-------|-------|---|-------|-------|------------|
|        | 1      | 2     | 3     | 4 | 5     | 6     |            |
| WAI 1  |        |       | 0.493 |   |       |       | 0.649      |
| WAI 2  |        |       | 0.350 |   |       |       | 0.783      |
| WAI 3  | 0.341  |       | 0.521 |   |       |       | 0.604      |
| WAI 4  | -0.451 |       |       |   |       |       | 0.627      |
| WAI 5  | -0.477 |       |       |   |       |       | 0.656      |
| WAI 6  |        |       |       |   |       |       | 0.849      |
| WAI 7  | 0.306  |       |       |   |       |       | 0.781      |
| WAI 8  | 0.594  |       |       |   |       |       | 0.503      |
| WAI 9  | 0.585  |       | 0.324 |   |       |       | 0.502      |
| WAI 10 | 0.557  |       | 0.308 |   |       |       | 0.521      |
| WFC 1  | -0.502 |       |       |   |       |       | 0.452      |
| WFC 2  | -0.635 | 0.325 |       |   |       | 0.304 | 0.349      |
| WFC 3  | -0.515 |       |       |   |       |       | 0.548      |
| WFC 4  |        |       |       |   | 0.491 |       | 0.633      |
| WFC 5  | -0.360 |       |       |   | 0.493 |       | 0.451      |
| WFC 6  | -0.339 |       |       |   | 0.490 |       | 0.493      |
| WHB 1  | -0.625 |       |       |   |       |       | 0.508      |
| WHB 2  | -0.743 | 0.325 |       |   |       |       | 0.207      |
| WHB 3  | 0.605  |       |       |   |       |       | 0.490      |
| WHB 4  | 0.712  |       |       |   |       |       | 0.341      |
| WHB 5  | -0.591 | 0.317 |       |   |       |       | 0.453      |
| WHB 6  | -0.691 |       | 0.303 |   |       |       | 0.335      |
| WHB 7  | 0.518  | 0.308 |       |   |       |       | 0.508      |

**Table S1.** Factor Loadings of the EFA performed for the Harman's single factor test

|        | Factor |       |   |        |   |   | Uniqueness |
|--------|--------|-------|---|--------|---|---|------------|
|        | 1      | 2     | 3 | 4      | 5 | 6 |            |
| WHB 8  | 0.515  |       |   | 0.336  |   |   | 0.499      |
| WHB 9  |        |       |   | 0.355  |   |   | 0.710      |
| WHB 10 | 0.321  |       |   | 0.340  |   |   | 0.677      |
| WHB 11 | 0.556  | 0.375 |   |        |   |   | 0.494      |
| WHB 12 | 0.545  | 0.324 |   | 0.335  |   |   | 0.419      |
| WHB 13 | 0.584  | 0.524 |   |        |   |   | 0.348      |
| WHB 14 | 0.694  | 0.482 |   |        |   |   | 0.242      |
| WHB 15 | 0.661  | 0.494 |   | -0.328 |   |   | 0.207      |
| WHB 16 | 0.660  | 0.487 |   | -0.307 |   |   | 0.215      |
| WHB 17 | 0.554  | 0.395 |   |        |   |   | 0.465      |
| JS     | 0.559  |       |   |        |   |   | 0.612      |

Note. 'Minimum residual' extraction method was used in combination with a 'none' rotation

## Factor Statistics

**Table S2.** Percentage of variance explained by the factors

| Factor | SS Loadings | % of Variance | Cumulative % |
|--------|-------------|---------------|--------------|
| 1      | 9.287       | 27.32         | 27.3         |
| 2      | 2.857       | 8.40          | 35.7         |
| 3      | 1.532       | 4.51          | 40.2         |
| 4      | 1.266       | 3.72          | 43.9         |
| 5      | 1.074       | 3.16          | 47.1         |
| 6      | 0.855       | 2.52          | 49.6         |

## Selection of control variables

require(MASS)

```

## Loading required package: MASS

contr<-
lm(Soddisfazione~Età+Genere+Istruzione+RelazioneAffettiva+Figli+Ruolo+Contratto+Full_PartTime,data1)
summary(contr)

##
## Call:
## lm(formula = Soddisfazione ~ Età + Genere + Istruzione + RelazioneAffettiva +
##     Figli + Ruolo + Contratto + Full_PartTime, data = data1)
##
## Residuals:
## <Labelled double>: soddisfazione lavorativa. - Sono complessivamente soddisfatto
## del lavoro che svolgo.
##      Min       1Q   Median       3Q      Max
## -2.74038 -0.53274  0.27206  0.51162  1.76365
##
## Labels:
##  value          label
##    1             1. PER NIENTE
##    2             2. INSODDISFATTO
##    3 3 NÉ SODDISFATTO NÉ INSODDISFATTO
##    4             4. SODDISFATTO
##    5             5. COMPLETAMENTE SODDISFATTO
##
## Coefficients:
##              Estimate Std. Error t value Pr(>|t|)
## (Intercept)    4.346584   0.554846   7.834 8.26e-14 ***
## Età            -0.012433   0.006135  -2.026  0.0436 *
## GenereWomen     0.063089   0.112286   0.562  0.5746
## Istruzione2     0.115427   0.238615   0.484  0.6289
## Istruzione3     0.168845   0.257967   0.655  0.5133
## Istruzione4     0.283846   0.321047   0.884  0.3773
## RelazioneAffettivaNo 0.314317   0.134687   2.334  0.0203 *
## FigliNo        -0.306835   0.138243  -2.220  0.0272 *
## Ruolo2         -0.484628   0.367556  -1.319  0.1883
## Ruolo3         -0.514379   0.350377  -1.468  0.1431
## Ruolo4         -0.428815   0.405113  -1.059  0.2907
## Ruolo5         -0.567063   0.437836  -1.295  0.1963
## Contratto2     0.024333   0.156549   0.155  0.8766
## Contratto3     0.051876   0.270385   0.192  0.8480
## Full_PartTime2  0.166996   0.155428   1.074  0.2835
## ---
## Signif. codes:  0 '***' 0.001 '**' 0.01 '*' 0.05 '.' 0.1 ' ' 1
##
## Residual standard error: 0.9238 on 300 degrees of freedom
## (3 observations deleted due to missingness)
## Multiple R-squared:  0.05804, Adjusted R-squared:  0.01408
## F-statistic: 1.32 on 14 and 300 DF, p-value: 0.1938

controlselection<-stepAIC(contr,direction = "backward")

```

```

## Start: AIC=-35.3
## Soddisfazione ~ Età + Genere + Istruzione + RelazioneAffettiva +
##   Figli + Ruolo + Contratto + Full_PartTime
##
##           Df Sum of Sq   RSS   AIC
## - Ruolo      4    2.0157 258.04 -40.831
## - Istruzione  3    0.7839 256.81 -40.338
## - Contratto  2    0.0438 256.07 -39.247
## - Genere     1    0.2694 256.29 -36.970
## - Full_PartTime 1    0.9852 257.01 -36.092
## <none>                256.02 -35.301
## - Età       1    3.5045 259.53 -33.019
## - Figli     1    4.2042 260.23 -32.171
## - RelazioneAffettiva 1    4.6477 260.67 -31.634
##
## Step: AIC=-40.83
## Soddisfazione ~ Età + Genere + Istruzione + RelazioneAffettiva +
##   Figli + Contratto + Full_PartTime
##
##           Df Sum of Sq   RSS   AIC
## - Istruzione  3    1.1661 259.20 -45.411
## - Contratto  2    0.2136 258.25 -44.570
## - Genere     1    0.1542 258.19 -42.643
## - Full_PartTime 1    1.2056 259.24 -41.363
## <none>                258.04 -40.831
## - Età       1    3.3797 261.42 -38.732
## - RelazioneAffettiva 1    4.7733 262.81 -37.057
## - Figli     1    5.0196 263.06 -36.762
##
## Step: AIC=-45.41
## Soddisfazione ~ Età + Genere + RelazioneAffettiva + Figli + Contratto +
##   Full_PartTime
##
##           Df Sum of Sq   RSS   AIC
## - Contratto  2    0.2701 259.48 -49.083
## - Genere     1    0.2857 259.49 -47.064
## <none>                259.20 -45.411
## - Full_PartTime 1    1.7386 260.94 -45.305
## - Età       1    3.6330 262.84 -43.026
## - RelazioneAffettiva 1    4.4109 263.62 -42.095
## - Figli     1    4.5232 263.73 -41.961
##
## Step: AIC=-49.08
## Soddisfazione ~ Età + Genere + RelazioneAffettiva + Figli + Full_PartTime
##
##           Df Sum of Sq   RSS   AIC
## - Genere     1    0.2654 259.74 -50.761
## - Full_PartTime 1    1.5617 261.04 -49.193
## <none>                259.48 -49.083
## - Figli     1    4.3588 263.83 -45.835
## - RelazioneAffettiva 1    4.4172 263.89 -45.765

```

```

## - Età          1    4.4490 263.92 -45.727
##
## Step: AIC=-50.76
## Soddisfazione ~ Età + RelazioneAffettiva + Figli + Full_PartTime
##
##           Df Sum of Sq   RSS   AIC
## - Full_PartTime    1    1.3396 261.08 -51.140
## <none>                259.74 -50.761
## - RelazioneAffettiva 1    4.3465 264.09 -47.533
## - Figli             1    4.5883 264.33 -47.245
## - Età               1    4.7159 264.46 -47.093
##
## Step: AIC=-51.14
## Soddisfazione ~ Età + RelazioneAffettiva + Figli
##
##           Df Sum of Sq   RSS   AIC
## <none>                261.08 -51.140
## - Figli             1    4.3785 265.46 -47.901
## - Età               1    4.6270 265.71 -47.607
## - RelazioneAffettiva 1    4.7519 265.83 -47.459

summary(controlselection)

##
## Call:
## lm(formula = Soddisfazione ~ Età + RelazioneAffettiva + Figli,
##     data = data1)
##
## Residuals:
## <Labelled double>: soddisfazione lavorativa. - Sono complessivamente soddisfatto
## del lavoro che svolgo.
##      Min       1Q   Median       3Q      Max
## -2.67351 -0.54721  0.30056  0.50130  1.63095
##
## Labels:
## value          label
## 1              1. PER NIENTE
## 2              2. INSODDISFATTO
## 3 3 NÉ SODDISFATTO NÉ INSODDISFATTO
## 4              4. SODDISFATTO
## 5              5. COMPLETAMENTE SODDISFATTO
##
## Coefficients:
##           Estimate Std. Error t value Pr(>|t|)
## (Intercept)  4.192105  0.267281  15.684 <2e-16 ***
## Età         -0.012965  0.005522  -2.348  0.0195 *
## RelazioneAffettivaNo  0.314381  0.132138  2.379  0.0180 *
## FigliNo     -0.304460  0.133314  -2.284  0.0231 *
## ---
## Signif. codes:  0 '***' 0.001 '**' 0.01 '*' 0.05 '.' 0.1 ' ' 1
##
## Residual standard error: 0.9162 on 311 degrees of freedom

```

```
## (3 observations deleted due to missingness)
## Multiple R-squared: 0.03943, Adjusted R-squared: 0.03016
## F-statistic: 4.255 on 3 and 311 DF, p-value: 0.005768
```

## Comparison of the characteristics of the sample with those of the population

**Table S3.** Comparison of the characteristics of the sample with those of the population of workers in north Italy

| Variable         |                                                    | Study sample<br>(n = 318) | North Italy <sup>a</sup><br>(n = 13754) |
|------------------|----------------------------------------------------|---------------------------|-----------------------------------------|
| Mean age (SD)    |                                                    | 38.14 (11.59)             | 44 (11.4)                               |
| Female gender    |                                                    | 56% (177)                 | 49%                                     |
| Education level  | Primary and lower secondary school                 | 7% (22)                   | 29%                                     |
|                  | Upper secondary school                             | 53% (169)                 | 50%                                     |
|                  | University or higher                               | 40% (127)                 | 21%                                     |
| Type of contract | Open-ended                                         | 79% (251)                 | 84%                                     |
|                  | Fixed-term                                         | 17% (53)                  | 16%                                     |
|                  | Other                                              | 4% (14)                   |                                         |
|                  | Job role                                           |                           |                                         |
|                  | Manager                                            | 3% (9)                    | 2%                                      |
|                  | Supervisor                                         | 13% (41)                  | 6.5%                                    |
|                  | White collar                                       | 72% (228)                 | 44.2%                                   |
|                  | Blue collar                                        | 8% (27)                   | 46.4%                                   |
|                  | Other                                              | 4% (13)                   | 0.9%                                    |
| Working hours    | Part-time                                          | 15% (49)                  | 21%                                     |
|                  | Full-time                                          | 85% (269)                 | 79%                                     |
| Occupation       | Chief Executives, Senior Officials and Legislators | 1.3% (4)                  | 1.2%                                    |
|                  | Professional                                       | 11.4% (36)                | 12.1%                                   |
|                  | Technicians and associate professionals            | 31.9% (101)               | 19%                                     |
|                  | Clerical support workers                           | 45.4% (144)               | 14.3%                                   |
|                  | Service and sales workers                          | 3.5% (11)                 | 17.9%                                   |
|                  | Factory worker, skilled laborer, building workers  | 5.3% (17)                 | 23.9%                                   |
|                  | Other occupations                                  | 1,2% (4)                  | 11.8%                                   |

<sup>a</sup> Data from a Two-stage stratified random sample of 92071 individuals, 42047 families (Istat, 2018).

## References

Istat. (2018) *Italian Labour Force Survey – October*. UniData - Bicocca Data Archive, Milan. Study Number SN202. Data file version 1.0

The jamovi project (2019). *jamovi*. (Version 1.0) [Computer Software]. Retrieved from <https://www.jamovi.org>.

R Core Team (2018). *R: A Language and environment for statistical computing*. [Computer software]. Retrieved from <https://cran.r-project.org/>.

Revelle, W. (2019). *psych: Procedures for Psychological, Psychometric, and Personality Research*. [R package]. Retrieved from <https://cran.r-project.org/package=psych>.

Venables WN, Ripley BD (2002). *Modern Applied Statistics with S*, Fourth edition. Springer, New York. ISBN 0-387-95457-0, <http://www.stats.ox.ac.uk/pub/MASS4>.
